# Supplementary material for: Daidzein supplementation enhances embryo survival by improving hormones, antioxidant capacity, and metabolic profiles of amniotic fluid in sows
Source: Royal Society of Chemistry journal article supplement (doi:10.1039/d0fo02472d), 2020-01-01
Supplement: d0fo02472d1.pdf [file d0fo02472d1.pdf]

1 **Supplementary Table 1.** The sensitivity and intra- and inter-assay coefficients of  
2 variation for E, P, LEP, and IGF-1<sup>1</sup>.

| <b>Item</b>           | <b>E</b> | <b>P</b>  | <b>LEP</b> | <b>IGF-1</b> |
|-----------------------|----------|-----------|------------|--------------|
| <b>Intra-assay CV</b> | 8.1%     | 7.8%      | 5.4%       | 5.7%         |
| <b>Inter-assay CV</b> | 9.2%     | 10.5%     | 9.4%       | 11.2%        |
| <b>Sensitivity</b>    | 10 pg/mL | 100 ng/mL | 100 ng/mL  | 1.0 µg/mL    |

3 <sup>1</sup>CV, coefficients of variation; E, estrogen; P, progesterone; LEP, leptin; IGF-1, insulin-  
4 like growth factor-1.

5

6

7

8

9

10

11

12

13

14

15

16

17

18

20 **Supplementary Table 2.** Metabolic Pathway Analysis for amniotic fluid metabolites.

| <b>Pathway Name</b>                                 | <b>Matched Metabolites</b> | <b>Raw <i>P</i>-value</b> | <b>-log(p)</b> | <b>FDR</b> |
|-----------------------------------------------------|----------------------------|---------------------------|----------------|------------|
| Aminoacyl-tRNA biosynthesis                         | Arginine, Tyrosine (2/75)  | 0.023753                  | 3.74           | 0.64119    |
| Arginine and proline metabolism                     | Arginine, Creatine (2/77)  | 0.024962                  | 3.6904         | 0.64119    |
| D-Arginine and D-ornithine metabolism               | Arginine (1/8)             | 0.02632                   | 3.6374         | 0.64119    |
| Amino sugar and nucleotide sugar metabolism         | Fucose, Fructose (2/88)    | 0.03206                   | 3.4402         | 0.64119    |
| Citrate cycle (TCA cycle)                           | Citric acid (1/20)         | 0.064663                  | 2.7386         | 0.72846    |
| Thiamine metabolism                                 | Tyrosine (1/24)            | 0.077147                  | 2.562          | 0.72846    |
| Phenylalanine, tyrosine and tryptophan biosynthesis | Tyrosine (1/27)            | 0.086414                  | 2.4486         | 0.72846    |
| Glycolysis or Gluconeogenesis                       | Lactic acid (1/31)         | 0.098643                  | 2.3162         | 0.72846    |
| Pyruvate metabolism                                 | Lactic acid (1/32)         | 0.10168                   | 2.2859         | 0.72846    |
| Propanoate metabolism                               | Lactic acid (1/35)         | 0.11073                   | 2.2007         | 0.72846    |

21 Total number of compounds involved in each pathway and metabolites matched from

22 the uploaded data; *P* is the original *P*-value calculated from the enrichment analysis.

23
